# Supplementary material for: Exploring similarities in reactivity of superatom species: a combined theoretical and experimental investigation
Source: Royal Society of Chemistry journal article supplement (doi:10.1039/c2cp23243j), 2011-12-20
Supplement: c2cp23243j.pdf [file c2cp23243j.pdf]

## Exploring Similarities in Reactivity of Superatom Species: A Combined Theoretical and Experimental Investigation

Eric C. Tyo, Melanie Nößler, Sabine Rabe, Christopher L. Harmon, Roland Mitř, Vlasta Bonačić -Koutecký\*, and A. Welford Castleman, Jr.\*

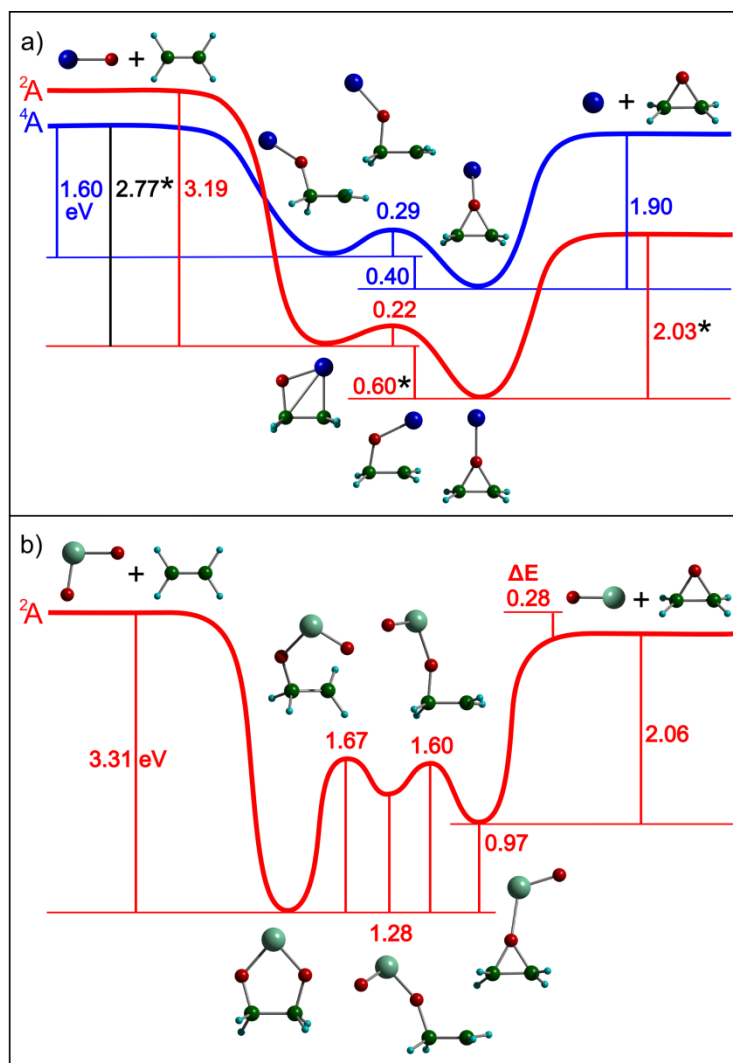

**Supporting Information Figure S1.** Calculated reaction profiles for oxidation of C<sub>2</sub>H<sub>4</sub> to ethylene oxide by a) NiO<sup>+</sup> and b) TiO<sub>2</sub><sup>+</sup>. The doublet and quartet state profiles are presented for interaction of NiO<sup>+</sup> with C<sub>2</sub>H<sub>4</sub>. Reaction in both states is exothermic by 1.76 eV and 0.10 eV, respectively. The energy differences labelled by \* allow for the determination of the most favourable reaction energy by undergoing a spin-crossover which is exothermic by 1.34 eV. The exothermic energy difference ΔE for TiO<sub>2</sub><sup>+</sup> is shown in b).

## Exploring Similarities in Reactivity of Superatom Species: A Combined Theoretical and Experimental Investigation

Eric C. Tyo, Melanie Nößler, Sabine Rabe, Christopher L. Harmon, Roland Mitř, Vlasta Bonaćić -Koutecký\*, and A. Welford Castleman, Jr.\*

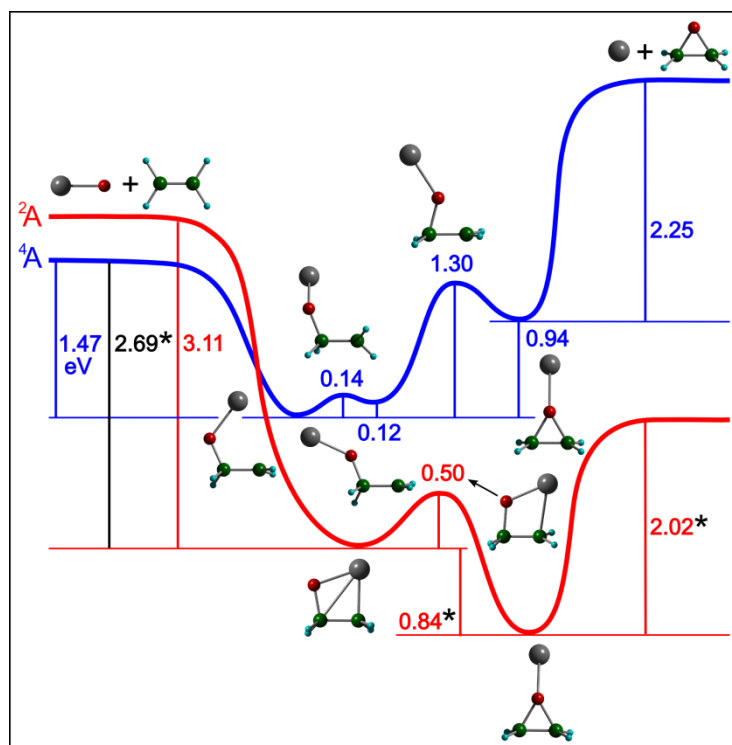

**Supporting Information Figure S2.** Calculated reaction profile for oxidation of  $C_2H_4$  to ethylene oxide by  $PdO^+$ . Profiles for doublet and quartet states are shown. The reaction is exothermic by 1.93 eV in the doublet state and endothermic by 1.72 eV in the quartet state. The energy differences labelled by \* allows for the determination of the most favourable reaction energy by undergoing a spin-crossover which is exothermic by 1.51 eV. (Creation of ethylene oxide through interaction of ethene and  $ZrO_2^+$  is an endothermic process and as such the reaction profile has not been included.)
